# Supplementary material for: Physical activity and sedentary behavior in preschoolers: a longitudinal assessment of trajectories and determinants
Source: PubMed Central journal article supplement (PMC5885465; doi:10.1186/s12966-018-0670-8), 2018-04-04
Supplement: 12966_2018_670_MOESM1_ESM.pdf [file 12966_2018_670_MOESM1_ESM.pdf]

## Additional file 1: Potential determinants

**Table 1: Detailed description of potential determinants of young children's objectively measured physical activity and sedentary behavior (n=498)**

|                                                         | Variable description and coding                                                                                                                                                                   | Use in analysis                                                                                | Mean (SD) or percentages |             | % missing |      |
|---------------------------------------------------------|---------------------------------------------------------------------------------------------------------------------------------------------------------------------------------------------------|------------------------------------------------------------------------------------------------|--------------------------|-------------|-----------|------|
|                                                         |                                                                                                                                                                                                   |                                                                                                | T0                       | T1          | T0        | T1   |
| <b>Demographic and biological variables</b>             |                                                                                                                                                                                                   |                                                                                                |                          |             |           |      |
| Sex                                                     | Child's gender                                                                                                                                                                                    | Binary variable (% boys)                                                                       | 53.8                     | 51.9        | None      | None |
| Age                                                     | Child's age                                                                                                                                                                                       | Continuous variable (years)                                                                    | 3.9 (0.7)                | 4.9 (0.7)   | None      | None |
| Birth weight                                            | Child's birth weight                                                                                                                                                                              | Continuous variable (grams)                                                                    | 3290 (570)               | 3280 (530)  | 6.0       | 6.1  |
| Chronic health condition                                | Whether or not child has a chronic condition                                                                                                                                                      | Re-coded to dichotomous variable (% with chronic health condition)                             | 7.5                      | 7.1         | 4.6       | 33.5 |
| BMI <sup>a</sup>                                        | BMI-for-age percentiles based on the World Health Organization (WHO) Child Growth Standards [1], categorized as normal (<85th percentile) vs. overweight and obese (≥85th percentile)             | Re-coded to dichotomous variable (% overweight or obese)                                       | 24.1                     | 18.5        | 2.4       | 31.7 |
| Gross motor skills <sup>a</sup>                         | Composite z-score of four individual sub-scores (walking, running, jumping, and hopping), assessed using the Zurich Neuromotor Assessment [2, 3]                                                  | Continuous variable (composite z-score)                                                        | 0.0 (1.0)                | 0.1 (1.1)   | 16.1      | 34.5 |
| Siblings                                                | Presence of older siblings in household                                                                                                                                                           | Binary variable (% having older siblings)                                                      | 43.2                     | 44.5        | 3.6       | 3.8  |
| Parental BMI                                            | Parental BMI divided into both parents normal- vs. at least one parent overweight or obese                                                                                                        | Re-coded to dichotomous variable (% at least one overweight or obese parent)                   | 52.2                     | 52.5        | 8.0       | 36.5 |
| SES                                                     | SES based on mother's or father's occupation (depending on who is highest) using the International Socio-Economic Index (ISEI) coding [4]                                                         | Continuous variable (parental ISEI score [range 16–90; increases with higher SES])             | 63.1 (15.5)              | 62.7 (15.6) | 4.4       | 16.3 |
| Family structure                                        | Single-parent vs. dual-parent household                                                                                                                                                           | Binary variable (% single parent households)                                                   | 10.4                     | 9.8         | 5.4       | 34.1 |
| <b>Psychological, cognitive and emotional variables</b> |                                                                                                                                                                                                   |                                                                                                |                          |             |           |      |
| Self-regulation <sup>a</sup>                            | Assessed using the Statue Test of the Neuropsychological Assessment for Children (NEPSY) [5]                                                                                                      | Continuous variable (NEPSY score [range 0-30; increases with better self-regulation])          | 19.2 (9.5)               | 23.3 (8.0)  | 14.3      | 32.7 |
| Psychological difficulties                              | Assessed using the Strengths and Difficulties Questionnaire (SDQ) [6], calculated as the sum of scores on the emotional, conduct, hyperactivity and peer relationship problem scales              | Continuous variable (SDQ total score [range 0-40; increases with more difficulties])           | 8.8 (4.3)                | 8.5 (4.7)   | 6.6       | 35.7 |
| Emotionality temperament                                | Assessed using the Emotionality, Activity, and Sociability Temperament Survey (EAS) [7, 8], calculated as the average of five items capturing the tendency to become aroused easily and intensely | Continuous variable (EAS emotionality score [range 1-5; increases with more pronounced trait]) | 2.8 (0.7)                | 2.8 (0.7)   | 6.6       | 36.1 |

|                                                 |                                                                                                                                                                                                                 |                                                                                            |                             |                             |     |      |
|-------------------------------------------------|-----------------------------------------------------------------------------------------------------------------------------------------------------------------------------------------------------------------|--------------------------------------------------------------------------------------------|-----------------------------|-----------------------------|-----|------|
| Activity temperament                            | Assessed using the Emotionality, Activity, and Sociability Temperament Survey (EAS) [7, 8], calculated as the average of five items capturing the preferred levels of activity and speed of action              | Continuous variable (EAS activity score [range 1-5; increases with more pronounced trait]) | 3.8 (0.7)                   | 3.7 (0.7)                   | 6.6 | 36.1 |
| Shyness temperament                             | Assessed using the Emotionality, Activity, and Sociability Temperament Survey (EAS) [7, 8], calculated as the average of five items capturing the tendency to be inhibited and awkward in new social situations | Continuous variable (EAS shyness score [range 1-5; increases with more pronounced trait])  | 2.4 (0.7)                   | 2.4 (0.7)                   | 6.6 | 36.1 |
| Parenting stress                                | Assessed using the Parenting Stress Scale (PSS) [9], calculated as the sum of scores on the 18-item questionnaire                                                                                               | Continuous variable (PSS score [range 5-90; increases with more parenting stress])         | 37.5 (7.5)                  | 37.6 (7.6)                  | 6.6 | 36.3 |
| Cognitive performance <sup>a</sup>              | Composite z-score of four individual sub-scores (perception, attention, memory, and reasoning) assessed using the Intelligence and Development Scales – Preschool (IDS-P) [10]                                  | Continuous variable (composite z-score)                                                    | 0.0 (1.0)                   | 0.1 (0.9)                   | 5.6 | 31.9 |
| <b>Behavioral variables</b>                     |                                                                                                                                                                                                                 |                                                                                            |                             |                             |     |      |
| Sleep duration                                  | Hours of sleep/night averaged over a week                                                                                                                                                                       | Continuous variable (hours)                                                                | 10.8 (0.6)                  | 10.8 (0.5)                  | 4.6 | 33.7 |
| Play frequency                                  | Child plays more than once per week vs. equal to or less than once per week with other children (sibling, friend, neighbor)                                                                                     | Re-coded to dichotomous variable (% more than once/week)                                   | 91.2                        | 93.1                        | 5.0 | 34.1 |
| <b>Social and cultural variables</b>            |                                                                                                                                                                                                                 |                                                                                            |                             |                             |     |      |
| Parental sedentary behavior                     | Average hours/day parents spends on screen-based or other sedentary activity                                                                                                                                    | Continuous variable (hours)                                                                | 2.8 [2.0, 4.5] <sup>b</sup> | 3.0 [2.0, 5.0] <sup>b</sup> | 5.2 | 33.9 |
| Parental sports club membership                 | At least one parent vs. none of parents has a sports club membership                                                                                                                                            | Re-coded to dichotomous variable (% at least one parent is member)                         | 32.0                        | 32.8                        | 7.2 | 34.4 |
| Parental physical activity                      | At least one parent vs. none of parents engages in ≥150min MVPA per week [11]                                                                                                                                   | Re-coded to dichotomous variable (% at least one parent is active)                         | 63.4                        | 61.6                        | 4.6 | 33.9 |
| Parental Involvement in child physical activity | At least one parent participates in ≥1 organized PA or ≥2 non-organized PAs with child per week vs. none of parents participates in the activities described above                                              | Re-coded to dichotomous variable (% at least one parent is involved)                       | 65.0                        | 52.3                        | 9.4 | 34.1 |
| Mode of transport to childcare                  | Active transport (walking) vs. passive transport to childcare                                                                                                                                                   | Binary variable (% active)                                                                 | 40.7                        | 48.1                        | 5.4 | 33.7 |
| Parental tobacco use                            | At least one parent vs. none of parents smokes                                                                                                                                                                  | Re-coded to dichotomous variable (% at least one parent smokes)                            | 24.1                        | 24.4                        | 5.6 | 33.7 |
| Parental alcohol consumption                    | Presence of a parent consuming alcohol in amounts greater than the recommended intake levels (males: 2 drinks/day, females: 1 drink/day [12, 13])                                                               | Re-coded to dichotomous variable (% at least one parent consumes large amounts)            | 5.5                         | 4.5                         | 4.8 | 33.3 |
| <b>Environmental variables</b>                  |                                                                                                                                                                                                                 |                                                                                            |                             |                             |     |      |
| Time outdoors                                   | Average hours per day child spends outdoors                                                                                                                                                                     | Continuous variable (hours)                                                                | 2.0 [1.5, 3.0] <sup>b</sup> | 2.0 [1.5, 3.0] <sup>b</sup> | 7.2 | 38.6 |

|                        |                                                                                                                                                                                                                 |                                                                                                      |            |            |      |      |
|------------------------|-----------------------------------------------------------------------------------------------------------------------------------------------------------------------------------------------------------------|------------------------------------------------------------------------------------------------------|------------|------------|------|------|
| Fixed toys             | Number of fixed play items at home (in-and outside)                                                                                                                                                             | Continuous variable (number of items [range 0-7])                                                    | 1.6 (1.5)  | 1.6 (1.6)  | 3.2  | 32.9 |
| Portable toys          | Number of portable play items at home (in-and outside)                                                                                                                                                          | Continuous variable (number of items [range 0-8])                                                    | 4.5 (1.5)  | 4.3 (1.5)  | 3.2  | 32.9 |
| Days at childcare      | Number of days per week child is in childcare                                                                                                                                                                   | Continuous variable (number of days [range 0-5])                                                     | 2.8 (1.2)  | 2.5 (1.3)  | 3.8  | 37.6 |
| Living area per person | Size of total indoor space per person                                                                                                                                                                           | Continuous variable (m <sup>2</sup> )                                                                | 30.8 (9.1) | 30.8 (8.9) | 6.8  | 34.1 |
| Neighborhood safety    | Parental perception of neighborhood safety measured using an 11-item questionnaire (based on [14-16]) on traffic density, road safety, crime, strangers and access to outdoor play facilities in the local area | Continuous variable (neighborhood safety sum score [range 0-44; increases with increasing concerns]) | 12.6 (7.0) | 12.4 (7.2) | 9.4  | 38.8 |
| Dog                    | Whether or not there is a dog in the household                                                                                                                                                                  | Binary variable (% dog owner)                                                                        | 6.9        | 5.5        | 6.0  | 33.3 |
| Season                 | Data collection conducted in summer vs. spring and autumn                                                                                                                                                       | Re-coded to dichotomous variable (% spring and fall months)                                          | 75.3       | 77.9       | None | 27.9 |
| Region                 | Urban vs. rural (urban defined as ≥50000 inhabitants [17])                                                                                                                                                      | Binary variable (% urban)                                                                            | 34.9       | 39.4       | None | 27.9 |

<sup>a</sup>Directly measured (all other information is parent-report)

<sup>b</sup>Median and inter-quartile range presented for skewed distribution

PA, physical activity; SB, sedentary behavior; BMI, Body mass index; SES, socio-economic status

## References

1. WHO Multicentre Growth Reference Study Group: **WHO Child Growth Standards: Length/height-for-age, weight-for-age, weight-for-length, weight-for-height and body mass index-for-age: Methods and development.** Geneva: World Health Organization; 2006.
2. Kakebeeke TH, Caflisch J, Chaouch A, Rousson V, Largo RH, Jenni OG: **Neuromotor development in children. Part 3: motor performance in 3- to 5-year-olds.** *Dev Med Child Neurol* 2013, **55**:248-256.
3. Kakebeeke TH, Locatelli I, Rousson V, Caflisch J, Jenni OG: **Improvement in gross motor performance between 3 and 5 years of age.** *Percept Mot Skills* 2012, **114**:795-806.
4. Ganzeboom HBG, De Graaf PM, Treiman DJ: **A standard international socio-economic index of occupational status.** *Social Science Research* 1992, **21**:1-56.
5. Korkman M, Kirk U, Kemp S: *NEPSY: A developmental neuropsychological assessment.* Psychological Corporation; 1998.
6. **Strengths and Difficulties Questionnaire (SDQ): information for researchers and professionals about the Strengths and Difficulties Questionnaire** [<http://www.sdqinfo.com/>]
7. Buss AH, Plomin R: *Temperament: Early developing personality traits.* Lawrence Erlbaum; 1984.
8. Spinath FM: **Temperamentsmerkmale bei Kindern.** *Zeitschrift für Differentielle und Diagnostische Psychologie* 2000, **21**:65-75.
9. Berry JO, Jones WH: **The Parental Stress Scale - Initial Psychometric Evidence.** *Journal of Social and Personal Relationships* 1995, **12**:463-472.
10. Grob A, Meyer CS, Hagmann-von Arx P: *Intelligence and Development Scales (IDS).* Bern: Hans Huber; 2009.
11. World Health Organization: **Global recommendations on physical activity for health.** Geneva: World Health Organization, ; 2010.
12. Schweizerische Gesellschaft für Ernährung: **Merckblatt Alkohol.** Berne, Switzerland; 2011.
13. U.S. Department of Health and Human Services and U.S. Department of Agriculture: **2015 – 2020 Dietary Guidelines for Americans.** 8th edition; 2015.
14. Saelens BE, Sallis JF, Black JB, Chen D: **Neighborhood-based differences in physical activity: An environment scale evaluation.** *American Journal of Public Health* 2003, **93**:1552-1558.
15. Timperio A, Crawford D, Telford A, Salmon J: **Perceptions about the local neighborhood and walking and cycling among children.** *Preventive Medicine* 2004, **38**:39-47.
16. Weir LA, Etelson D, Brand DA: **Parents' perceptions of neighborhood safety and children's physical activity.** *Preventive Medicine* 2006, **43**:212-217.
17. OECD: **Redefining "Urban": A New Way to Measure Metropolitan Areas.** OECD Publishing; 2012.
