# Supplementary material for: Physical activity and sedentary behavior in preschoolers: a longitudinal assessment of trajectories and determinants
Source: PubMed Central journal article supplement (PMC5885465; doi:10.1186/s12966-018-0670-8), 2018-04-04

**Additional file 2. Flow Chart**

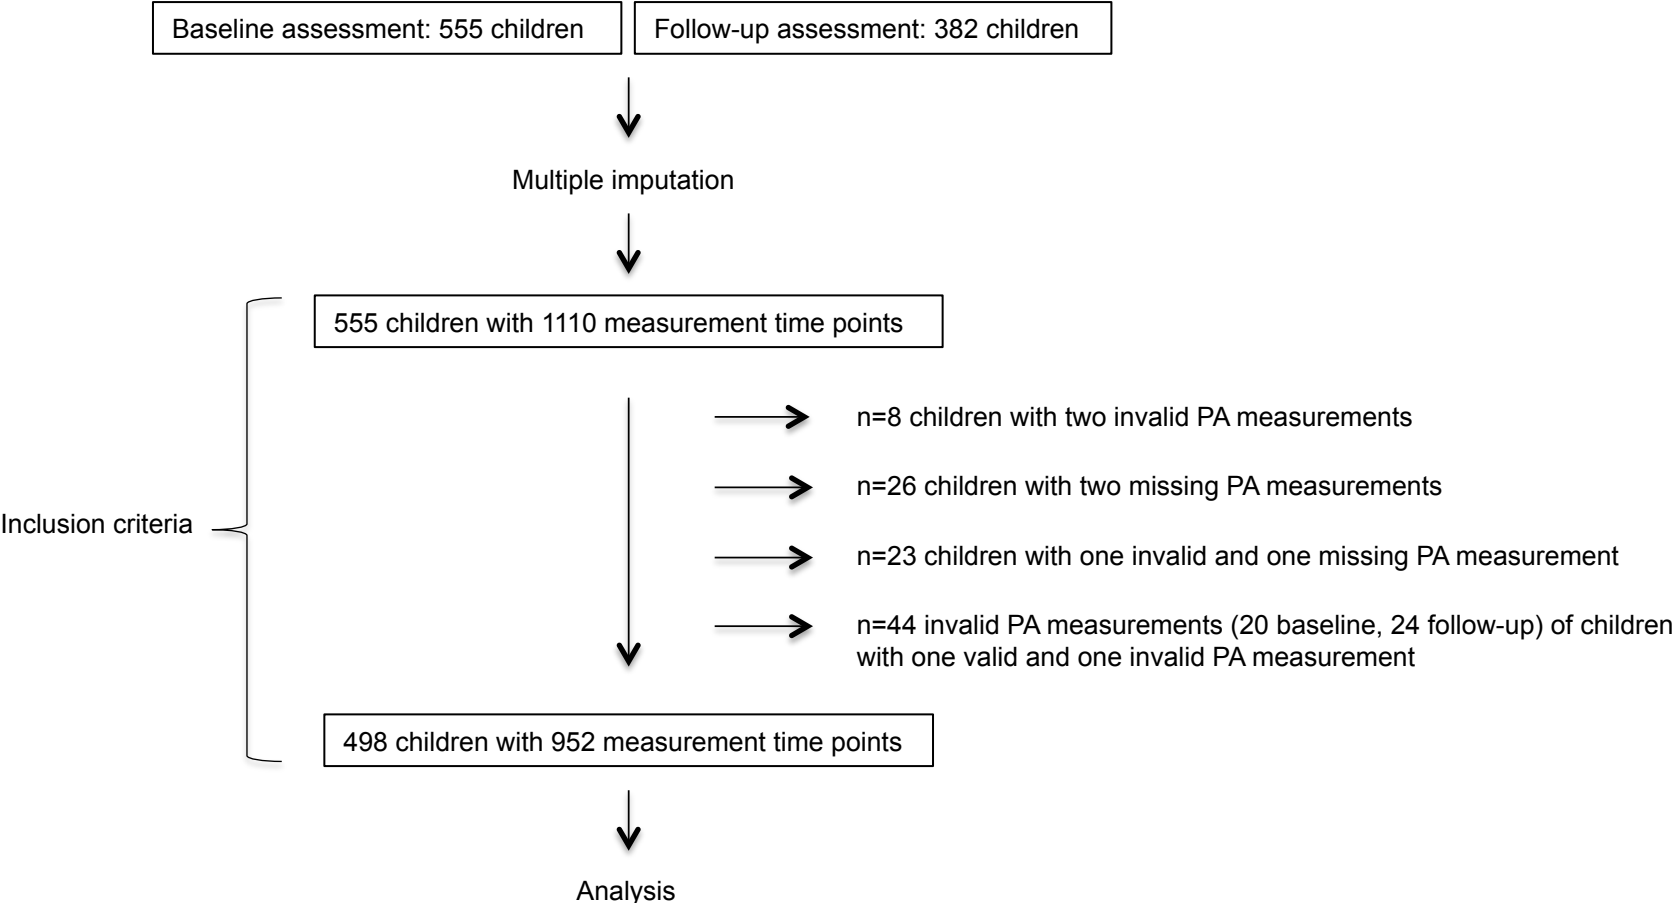

Supplement: 12966_2018_670_MOESM2_ESM.pdf [file 12966_2018_670_MOESM2_ESM.pdf]
